# Supplementary material for: Concise synthesis of the (±)-Nb-desmethyl-meso-chimonanthine
Source: Royal Society of Chemistry journal article supplement (doi:10.1039/b610497e), 2006-01-01
Supplement: b610497e.pdf [file b610497e.pdf]

## Concise Synthesis of the ( $\pm$ )- $N_b$ -Desmethyl-*meso*-Chimonanthine

Candice Menozzi, Peter I. Dalko,\* Janine Cossy

Laboratoire de Chimie Organique, ESPCI, 10 rue Vauquelin, 75231 Paris Cedex 05 - France;  
Fax: +33 (0)140794660; e-mail: peter.dalko@espci.fr

**$N_b$ -Desmethyl-*meso*-chimonanthine (3):** White foam;  $R_f = 0.30$  ( $\text{CH}_2\text{Cl}_2/\text{MeOH}/\text{NH}_4\text{OH}$  9/1/1); IR (neat) 1602, 1483, 737  $\text{cm}^{-1}$ ;  $^1\text{H}$  NMR (300 MHz,  $\text{CDCl}_3$ )  $\delta$  6.98-6.88 (m, 3H), 6.60-6.42 (m, 3H), 6.41 (d,  $J = 7.9$  Hz, 1H), 6.40 (d,  $J = 7.7$  Hz, 1H), 4.97 (s, 1H), 4.46 (s, 1H), 3.85 (s, 1H), 3.02 (dd,  $J = 10.5, 6.6$  Hz, 1H), 2.74-2.70 (m, 1H), 2.66-2.63 (m, 1H), 2.44-2.38 (m, 1H), 2.30 (s, 3H), 2.30-2.20 (m, 2H), 2.10 (dd,  $J = 11.7, 5.1$  Hz, 1H), 2.01 (dd,  $J = 10.0, 1.8$  Hz, 1H).  $^{13}\text{C}$  NMR (75 MHz,  $\text{CDCl}_3$ )  $\delta$  151.6 (2C), 131.5, 131.4, 128.1 (2C), 124.7, 124.3, 118.8, 118.3, 108.8, 108.4, 83.4, 80.1, 64.4, 63.6, 52.2, 45.6, 38.0, 36.5, 35.7 ( $\text{CH}_3$ ); MS ( $\text{CH}_4$ )  $m/z$ : 333 ( $\text{M}^+ + 1$ , 100), 173 (65), 159 (25); HRMS  $m/z$ : 333.2087 [ $\text{M}^+ + 1$ ] (calcd for  $\text{C}_{21}\text{H}_{24}\text{N}_4$ , 332.2001).

**Compound 12:** Orange foam;  $R_f = 0.21$  (pentane/ethyl acetate 2/1); IR (neat) 2094, 1703, 1617, 739  $\text{cm}^{-1}$ ;  $^1\text{H}$  NMR (300 MHz,  $\text{CDCl}_3$ )  $\delta$  8.85 (s, 1H), 7.99 (s, 1H), 7.37 (d,  $J = 7.5$  Hz, 1H), 7.34 (d,  $J = 8.0$  Hz, 1H), 7.25 (td,  $J = 7.5, 1.0$  Hz, 1H), 7.18 (td,  $J = 7.5, 1.0$  Hz, 1H), 7.17 (d,  $J = 7.5$  Hz, 1H), 7.08 (td,  $J = 6.5, 1.0$  Hz, 1H), 7.04 (td,  $J = 7.5, 1.0$  Hz, 1H), 6.93 (d,  $J = 2.0$  Hz, 1H), 6.88 (d,  $J = 7.5$  Hz, 1H), 3.26-3.14 (m, 2H), 3.00-2.72 (m, 4H), 2.58 (s, 3H), 2.38-2.20 (m, 2H);  $^{13}\text{C}$  NMR (75 MHz,  $\text{CDCl}_3$ )  $\delta$  179.9, 140.7, 136.2, 129.7, 129.0, 127.5, 124.6, 122.8, 121.9, 121.7, 119.2, 118.8, 114.1, 111.1, 110.4, 68.8, 52.4, 46.6, 35.5, 34.4, 24.8; MS ( $\text{NH}_3$ )  $m/z$ : 375 ( $\text{M}^+ + 1$ , 100), 304 (10), 188 (20), 175 (43).
